# Supplementary material for: Synthesis and characterization of La QDs: sensors for anions and H2O2
Source: Royal Society of Chemistry journal article supplement (doi:10.1039/d4sd00142g), 2024-01-01
Supplement: d4sd00142g1.pdf [file d4sd00142g1.pdf]

## Synthesis and Characterization of La QDs: Sensor for Anions and $\text{H}_2\text{O}_2$

### Supplementary information:

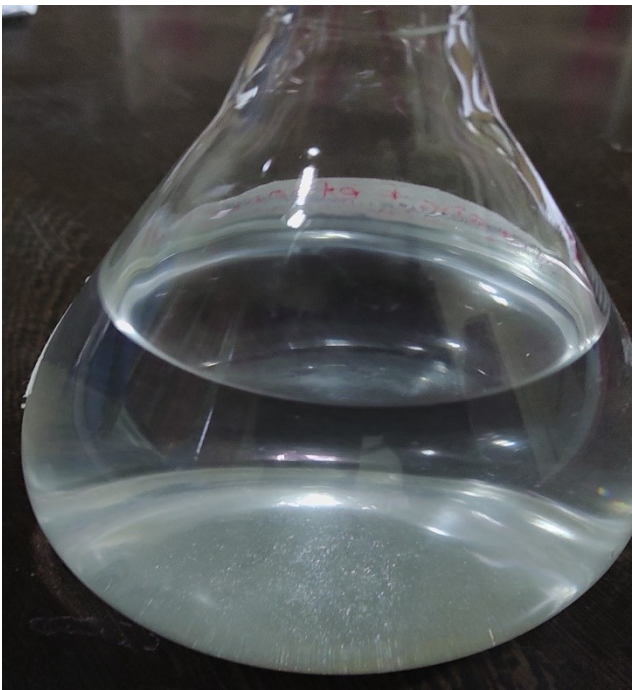

**Daylight**

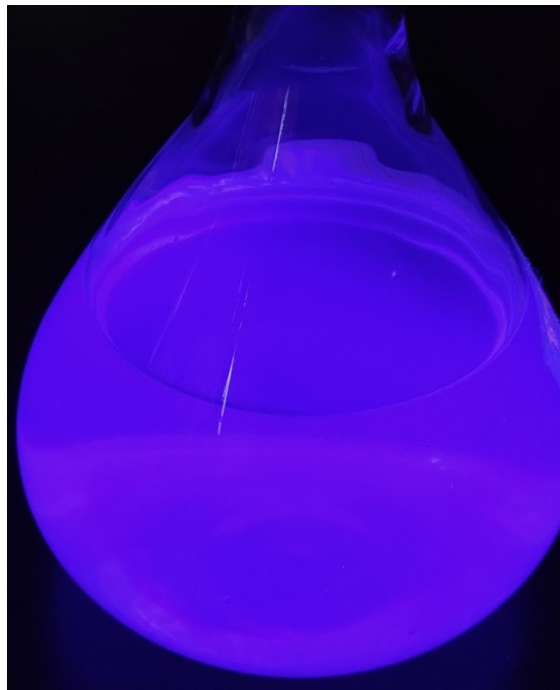

**UV light**

**S1:** The visual of the La QDs in ethanol under UV irradiation.

## XRD Study:

To find the d-spacing(d) of the XRD peaks Bragg's equation (Equation E1) solution is used at the  $\lambda=0.15406\text{nm}$  <sup>38</sup>.

$$n\lambda = 2d \sin(\theta) \quad (\text{E1})$$

The lattice constants (a=b=c for cubic, a=b≠c for hexagonal) were calculated by the user of equations E2, and E3 and matched with the standard lattice constants values of the PDF.

Hexagonal crystal lattice constants were calculated by using equation E2.

$$\frac{1}{(d - spacing)^2} = \frac{4(h^2 + k^2 + hk)}{3a^2} + \frac{l^2}{c^2} \quad (\text{E2})$$

Cubic crystal lattice constants were calculated by using equation E3.

$$\frac{1}{(d - spacing)^2} = \frac{h^2 + k^2 + l^2}{a^2} \quad (\text{E3})$$

By using the Scherrer equation (Equation E4) the crystal grain size (L) was calculated, i.e.

$$L = \frac{k\lambda}{B \cos(\theta)} \quad (\text{E4})$$

where  $k$  is a dimensionless shape factor with a typical value of roughly 0.9,  $\theta$  is the Bragg angle,  $\lambda$  is the X-ray wavelength (0.15406 nm),  $\theta$  is the wavelength of the X-ray,  $B$  is the line whose intensity is halved at maximum intensity (FWHM).

**Bandgap energy observation:**

The optical band gap energy of the La QDs was calculated through the Tauc plot method (Equation E5).

$$(ah\nu)^{1/y} = B(h\nu - E_g) \tag{E5}$$

where,  $\nu$  = Photon's frequency,

$B$  = Constant,

$h$  = Planck constant,

$Y = 1/2$  or,  $2$  for direct and indirect transition band gaps, respectively,

$E_g$  = Band gap energy.

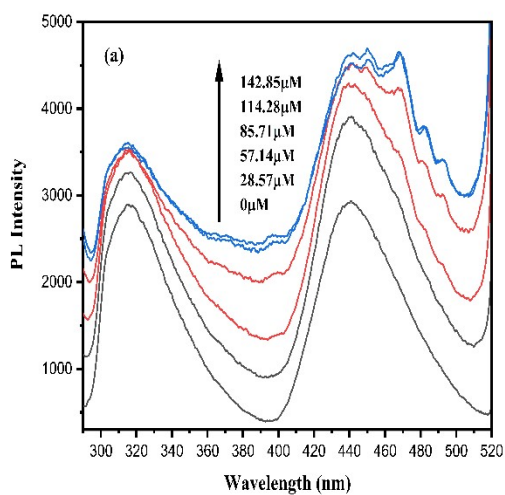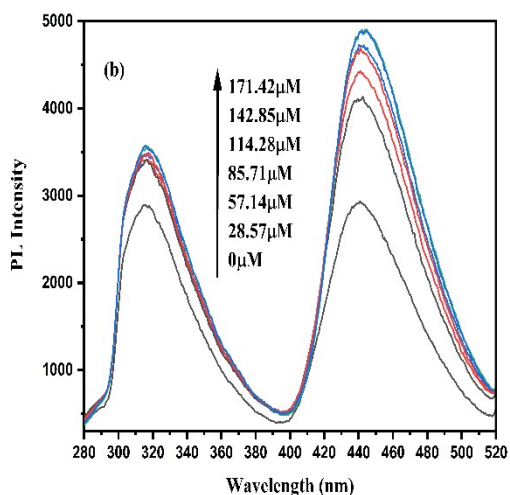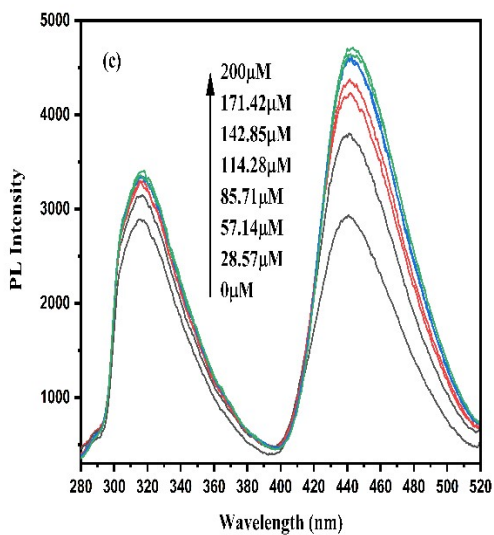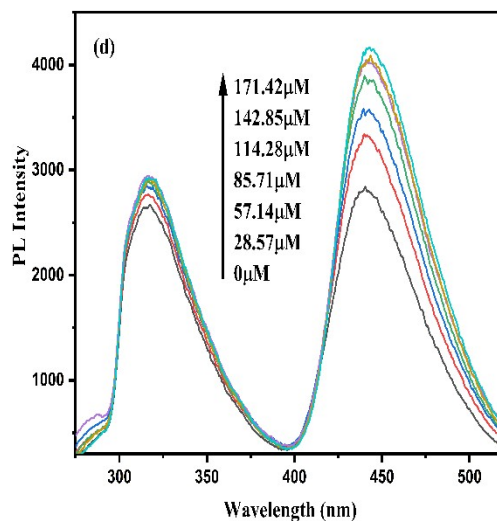

**S2:** Emission Spectra of the optical La QDs sensor at 315 and 440.5 nm wavelength on excitation at 265nm under different (a)  $[C_2O_4^{2-}]$ , (b)  $[Br^-]$ , (c)  $[BrO_3^-]$ , (d)  $[Cl^-]$ .

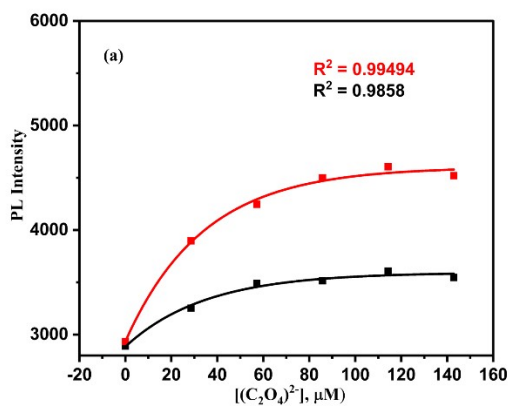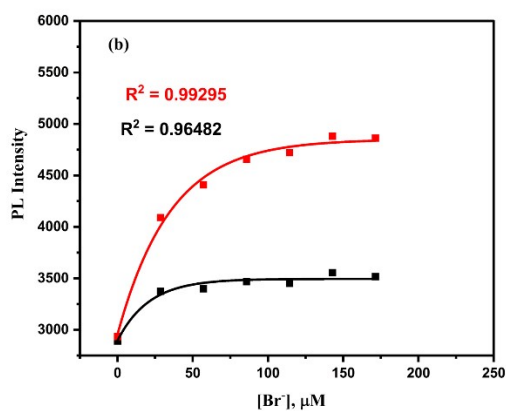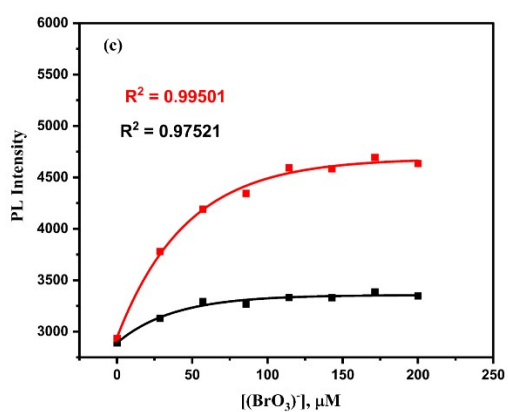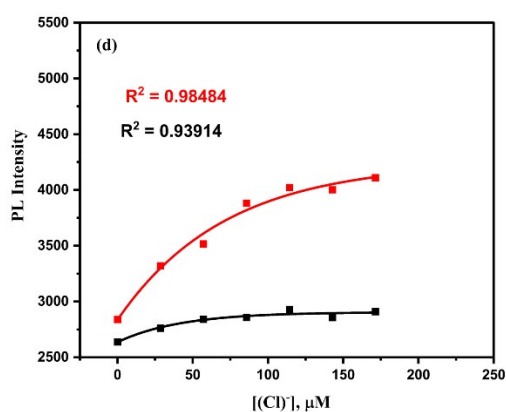

**S3:** (a) Calibration curves of  $C_2O_4^{2-}$ -sensors peak at 315nm and 440.5 nm wavelengths, (b) Calibration curves of  $Br^-$  sensors peak at 315nm and 440.5 nm wavelengths, (c) Calibration curves of  $BrO_3^-$  sensors peak at 315nm and 440.5 nm wavelengths, (d) Calibration curves of  $Cl^-$  sensors peak at 315nm and 440.5 nm wavelengths.

**T1: Calibration curves of F<sup>-</sup> sensors peak at 315nm and 440.5 nm wavelengths.**

**a) At 315nm Peak**

| Model                   | Linear                |
|-------------------------|-----------------------|
| Equation                | $y = A + Bx$          |
| A                       | 2840.97214 ± 30.97025 |
| B                       | 3.38669 ± 0.30065     |
| Residual Sum of Squares | 10329.37444           |
| R-Square (COD)          | 0.96209               |
| Adj. R-Square           | 0.95451               |

**b) At 440.5nm Peak**

| Model                   | Linear              |
|-------------------------|---------------------|
| Equation                | $y = A + Bx$        |
| A                       | 2992.715 ± 57.01654 |
| B                       | 11.15023 ± 0.5535   |
| Residual Sum of Squares | 35009.54296         |
| R-Square (COD)          | 0.98783             |
| Adj. R-Square           | 0.98539             |

**T2: Calibration curves of (C<sub>2</sub>O<sub>4</sub>)<sup>2-</sup> sensors peak at 315nm and 440.5 nm wavelengths.**

**a) At 315nm Peak**

| Model           | Asymptotic           |
|-----------------|----------------------|
| Equation        | $y = A - BC^x$       |
| A               | 3594.77404 ± 36.5841 |
| B               | 710.10037 ± 51.27378 |
| C               | 0.97179 ± 0.00535    |
| Reduced Chi-Sqr | 1732.88744           |
| R-Square (COD)  | 0.9858               |
| Adj. R-Square   | 0.97633              |

**b) At 440.5nm Peak**

| Model           | Asymptotic            |
|-----------------|-----------------------|
| Equation        | $y = A - BC^x$        |
| A               | 4603.18656 ± 49.756   |
| B               | 1668.47565 ± 71.26134 |
| C               | 0.97094 ± 0.00325     |
| Reduced Chi-Sqr | 3399.17413            |
| R-Square (COD)  | 0.99494               |
| Adj. R-Square   | 0.99156               |

**T3: Calibration curves of  $(\text{CO}_3)^{2-}$  sensors peak at 315nm and 440.5 nm wavelengths.**

**a) At 315nm Peak**

| Model           | Asymptotic                 |
|-----------------|----------------------------|
| Equation        | $y = A - BC^x$             |
| A               | $3899.83032 \pm 123.54159$ |
| B               | $922.03908 \pm 143.80652$  |
| C               | $0.98606 \pm 0.00593$      |
| Reduced Chi-Sqr | 15668.78394                |
| R-Square (COD)  | 0.88463                    |
| Adj. R-Square   | 0.84618                    |

**b) At 440.5nm Peak**

| Model           | Asymptotic                 |
|-----------------|----------------------------|
| Equation        | $y = A - BC^x$             |
| A               | $5594.24238 \pm 172.02548$ |
| B               | $2516.96958 \pm 259.29451$ |
| C               | $0.98167 \pm 0.0048$       |
| Reduced Chi-Sqr | 58873.90828                |
| R-Square (COD)  | 0.94069                    |
| Adj. R-Square   | 0.92092                    |



**T4: Calibration curves of  $(\text{HPO}_4)^{2-}$  sensors peak at 315nm and 440.5 nm wavelengths.**

**a) At 315nm Peak**

| Model           | Asymptotic                |
|-----------------|---------------------------|
| Equation        | $y = A - BC^x$            |
| A               | $3418.62035 \pm 18.94071$ |
| B               | $528.05859 \pm 32.80627$  |
| C               | $0.02206 \pm 4.31023E19$  |
| Reduced Chi-Sqr | 717.50078                 |
| R-Square (COD)  | 0.99661                   |
| Adj. R-Square   | 0.98983                   |

**b) At 440.5nm Peak**

| Model           | Asymptotic                 |
|-----------------|----------------------------|
| Equation        | $y = A - BC^x$             |
| A               | $4669.40318 \pm 276.35329$ |
| B               | $1699.14744 \pm 361.76002$ |
| C               | $0.94707 \pm 0.02518$      |
| Reduced Chi-Sqr | 65391.77839                |
| R-Square (COD)  | 0.96045                    |
| Adj. R-Square   | 0.88135                    |

**T5: Calibration curves of Br<sup>-</sup> sensors peak at 315nm and 440.5 nm wavelengths.**

**a) At 315nm Peak**

| Model           | Asymptotic            |
|-----------------|-----------------------|
| Equation        | $y = A - BC^x$        |
| A               | 3494.59573 ± 27.06847 |
| B               | 599.59334 ± 57.36622  |
| C               | 0.95339 ± 0.01227     |
| Reduced Chi-Sqr | 2661.52435            |
| R-Square (COD)  | 0.96482               |
| Adj. R-Square   | 0.94723               |

**b) At 440.5nm Peak**

| Model           | Asymptotic            |
|-----------------|-----------------------|
| Equation        | $y = A - BC^x$        |
| A               | 4850.60968 ± 49.41066 |
| B               | 1897.31456 ± 80.6551  |
| C               | 0.97193 ± 0.00303     |
| Reduced Chi-Sqr | 5028.61457            |
| R-Square (COD)  | 0.99295               |
| Adj. R-Square   | 0.98942               |

**T6: Calibration curves of (BrO<sub>3</sub>)<sup>-</sup>sensors peak at 315nm and 440.5nm wavelengths.**

**a) At 315nm Peak**

| Model           | Asymptotic            |
|-----------------|-----------------------|
| Equation        | $y = A - BC^x$        |
| A               | 3356.18635 ± 18.56898 |
| B               | 465.7295 ± 33.23463   |
| C               | 0.97365 ± 0.00463     |
| Reduced Chi-Sqr | 927.16815             |
| R-Square (COD)  | 0.97521               |
| Adj. R-Square   | 0.9653                |

**b) At 440.5nm Peak**

| Model           | Asymptotic            |
|-----------------|-----------------------|
| Equation        | $y = A - BC^x$        |
| A               | 4684.84755 ± 36.3126  |
| B               | 1742.30106 ± 55.61913 |
| C               | 0.97836 ± 0.00175     |
| Reduced Chi-Sqr | 2529.38459            |
| R-Square (COD)  | 0.99501               |
| Adj. R-Square   | 0.99301               |

**T7: Calibration curves of (OH)<sup>-</sup> sensors peak at 315nm and 440.5nm wavelengths.**

**a) At 315nm Peak**

| Model           | Asymptotic               |
|-----------------|--------------------------|
| Equation        | $y = A - BC^x$           |
| A               | $3231.05743 \pm 15.2501$ |
| B               | $340.74005 \pm 18.67889$ |
| C               | $0.98316 \pm 0.00247$    |
| Reduced Chi-Sqr | 252.43998                |
| R-Square (COD)  | 0.98656                  |
| Adj. R-Square   | 0.98119                  |

**b) At 440.5nm Peak**

| Model           | Asymptotic                |
|-----------------|---------------------------|
| Equation        | $y = A - BC^x$            |
| A               | $4374.58031 \pm 11.91895$ |
| B               | $1440.90078 \pm 15.1365$  |
| C               | $0.98246 \pm 4.9002E-4$   |
| Reduced Chi-Sqr | 170.99122                 |
| R-Square (COD)  | 0.99949                   |
| Adj. R-Square   | 0.99928                   |

**T8: Calibration curves of (Cl)<sup>-</sup> sensors peak at 315nm and 440.5nm wavelengths.**

**a) At 315nm Peak**

| Model           | Asymptotic                |
|-----------------|---------------------------|
| Equation        | $y = A - BC^x$            |
| A               | $2905.41207 \pm 24.71386$ |
| B               | $269.22243 \pm 35.1174$   |
| C               | $0.97652 \pm 0.00795$     |
| Reduced Chi-Sqr | 902.02732                 |
| R-Square (COD)  | 0.93914                   |
| Adj. R-Square   | 0.9087                    |

**b) At 440.5nm Peak**

| Model           | Asymptotic                 |
|-----------------|----------------------------|
| Equation        | $y = A - BC^x$             |
| A               | $4245.41798 \pm 117.89879$ |
| B               | $1409.41201 \pm 115.62499$ |
| C               | $0.98613 \pm 0.00297$      |
| Reduced Chi-Sqr | 4960.76216                 |
| R-Square (COD)  | 0.98484                    |
| Adj. R-Square   | 0.97727                    |

**T9: Stern-Volmer plots of F<sup>-</sup> sensors peak at 315 and 440.5 nm wavelengths.**

**a) At 315nm Peak**

|                         |                             |
|-------------------------|-----------------------------|
| Model                   | Stern-Volmer (at 315 nm)    |
| Equation                | $I_0/I = 1 \pm K_{sv} [Q]$  |
| $K_{sv}$                | $-8.9897E-4 \pm 5.19318E-5$ |
| Residual Sum of Squares | 0.0012                      |
| Pearson's r             | 0.79629                     |
| R-Square (COD)          | 0.9998                      |
| Adj. R-Square           | 0.99977                     |

**b) At 440.5nm Peak**

|                         |                            |
|-------------------------|----------------------------|
| Model                   | Stern-Volmer (at 440.5 nm) |
| Equation                | $I_0/I = 1 \pm K_{sv} [Q]$ |
| $K_{sv}$                | $-0.0026 \pm 1.49089E-4$   |
| Residual Sum of Squares | 0.00991                    |
| Pearson's r             | 0.72763                    |
| R-Square (COD)          | 0.99765                    |
| Adj. R-Square           | 0.99726                    |

**T10: Stern-Volmer plots of (C<sub>2</sub>O<sub>4</sub>)<sup>2-</sup> sensors peak at 315 and 440.5 nm wavelengths.**

**a) At 315nm Peak**

| Model                   | Stern-Volmer (at 315 nm)   |
|-------------------------|----------------------------|
| Equation                | $I_0/I = 1 \pm K_{sv} [Q]$ |
| K <sub>sv</sub>         | -0.00172 ± 2.4926E-4       |
| Residual Sum of Squares | 0.01395                    |
| Pearson's r             | 0.78499                    |
| R-Square (COD)          | 0.99687                    |
| Adj. R-Square           | 0.99624                    |

**b) At 440.5nm Peak**

| Model                   | Stern-Volmer (at 440.5 nm) |
|-------------------------|----------------------------|
| Equation                | $I_0/I = 1 \pm K_{sv} [Q]$ |
| K <sub>sv</sub>         | -0.00326 ± 5.03245E-4      |
| Residual Sum of Squares | 0.05685                    |
| Pearson's r             | 0.73404                    |
| R-Square (COD)          | 0.98275                    |
| Adj. R-Square           | 0.9793                     |

**T11: Stern-Volmer plots of (CO<sub>3</sub>)<sup>2-</sup> sensors peak at 315 and 440.5 nm wavelengths.**

**a) At 315nm Peak**

|                         |                            |
|-------------------------|----------------------------|
| Model                   | Stern-Volmer (at 315 nm)   |
| Equation                | $I_0/I = 1 \pm K_{sv} [Q]$ |
| K <sub>sv</sub>         | -0.00143 ± 1.63949E-4      |
| Residual Sum of Squares | 0.03581                    |
| Pearson's r             | 0.79327                    |
| R-Square (COD)          | 0.99398                    |
| Adj. R-Square           | 0.99323                    |

**b) At 440.5nm Peak**

|                         |                            |
|-------------------------|----------------------------|
| Model                   | Stern-Volmer (at 440.5 nm) |
| Equation                | $I_0/I = 1 \pm K_{sv} [Q]$ |
| K <sub>sv</sub>         | -0.00279 ± 3.73076E-4      |
| Residual Sum of Squares | 0.18542                    |
| Pearson's r             | 0.72381                    |
| R-Square (COD)          | 0.94902                    |
| Adj. R-Square           | 0.94265                    |



**T12: Stern-Volmer plots of (HPO<sub>4</sub>)<sup>2-</sup> sensors peak at 315 and 440.5 nm wavelengths.**

**a) At 315nm Peak**

| Model                   | Stern-Volmer (at 315 nm)   |
|-------------------------|----------------------------|
| Equation                | $I_0/I = 1 \pm K_{sv} [Q]$ |
| K <sub>sv</sub>         | -0.00241 ± 9.71804E-4      |
| Residual Sum of Squares | 0.0237                     |
| Pearson's r             | 0.66877                    |
| R-Square (COD)          | 0.99246                    |
| Adj. R-Square           | 0.98994                    |

**b) At 440.5nm Peak**

| Model                   | Stern-Volmer (at 440.5 nm) |
|-------------------------|----------------------------|
| Equation                | $I_0/I = 1 \pm K_{sv} [Q]$ |
| K <sub>sv</sub>         | -0.00532 ± 0.00161         |
| Residual Sum of Squares | 0.0648                     |
| Pearson's r             | 0.59079                    |
| R-Square (COD)          | 0.9732                     |
| Adj. R-Square           | 0.96427                    |

**T13: Stern-Volmer plots of Br<sup>-</sup> sensors peak at 315nm and 440.5 nm wavelengths.**

**a) At 315nm Peak**

|                         |                            |
|-------------------------|----------------------------|
| Model                   | Stern-Volmer (at 315 nm)   |
| Equation                | $I_0/I = 1 \pm K_{sv} [Q]$ |
| $K_{sv}$                | $-0.00138 \pm 2.20617E-4$  |
| Residual Sum of Squares | 0.02169                    |
| Pearson's r             | 0.80087                    |
| R-Square (COD)          | 0.99582                    |
| Adj. R-Square           | 0.99512                    |

**b) At 440.5nm Peak**

|                         |                            |
|-------------------------|----------------------------|
| Model                   | Stern-Volmer (at 440.5 nm) |
| Equation                | $I_0/I = 1 \pm K_{sv} [Q]$ |
| $K_{sv}$                | $-0.00306 \pm 4.59177E-4$  |
| Residual Sum of Squares | 0.09397                    |
| Pearson's r             | 0.73481                    |
| R-Square (COD)          | 0.97288                    |
| Adj. R-Square           | 0.96836                    |

**T14: Stern-Volmer plots of (BrO<sub>3</sub>)<sup>-</sup>sensors peak at 315nm and 440.5nm wavelengths.**

**a) At 315nm Peak**

|                         |                              |
|-------------------------|------------------------------|
| Model                   | Stern-Volmer (at 315 nm)     |
| Equation                | $I_0/I = 1 \pm K_{sv} [Q]$   |
| $K_{sv}$                | $-9.23223E-4 \pm 1.21749E-4$ |
| Residual Sum of Squares | 0.01186                      |
| Pearson's r             | 0.81298                      |
| R-Square (COD)          | 0.99814                      |
| Adj. R-Square           | 0.99788                      |

**b) At 440.5nm Peak**

|                         |                            |
|-------------------------|----------------------------|
| Model                   | Stern-Volmer (at 440.5 nm) |
| Equation                | $I_0/I = 1 \pm K_{sv} [Q]$ |
| $K_{sv}$                | $-0.00247 \pm 3.28232E-4$  |
| Residual Sum of Squares | 0.08618                    |
| Pearson's r             | 0.75181                    |
| R-Square (COD)          | 0.97927                    |
| Adj. R-Square           | 0.97631                    |

**T15: Stern-Volmer plots of (OH)<sup>-</sup> sensors peak at 315nm and 440.5nm wavelengths.**

**a) At 315nm Peak**

|                         |                              |
|-------------------------|------------------------------|
| Model                   | Stern-Volmer (at 315 nm)     |
| Equation                | $I_0/I = 1 \pm K_{sv} [Q]$   |
| $K_{sv}$                | $-6.48044E-4 \pm 6.84704E-5$ |
| Residual Sum of Squares | 0.00375                      |
| Pearson's r             | 0.81858                      |
| R-Square (COD)          | 0.99946                      |
| Adj. R-Square           | 0.99938                      |

**b) At 440.5nm Peak**

|                         |                            |
|-------------------------|----------------------------|
| Model                   | Stern-Volmer (at 440.5 nm) |
| Equation                | $I_0/I = 1 \pm K_{sv} [Q]$ |
| $K_{sv}$                | $-0.0021 \pm 2.47209E-4$   |
| Residual Sum of Squares | 0.04889                    |
| Pearson's r             | 0.76502                    |
| R-Square (COD)          | 0.98958                    |
| Adj. R-Square           | 0.98809                    |

**T16: Stern-Volmer plots of (Cl)<sup>-</sup> sensors peak at 315nm and 440.5nm wavelengths.**

**a) At 315nm Peak**

|                         |                              |
|-------------------------|------------------------------|
| Model                   | Stern-Volmer (at 315 nm)     |
| Equation                | $I_0/I = 1 \pm K_{sv} [Q]$   |
| $K_{sv}$                | $-6.75802E-4 \pm 8.85997E-5$ |
| Residual Sum of Squares | 0.0035                       |
| Pearson's r             | 0.81585                      |
| R-Square (COD)          | 0.99943                      |
| Adj. R-Square           | 0.99933                      |

**b) At 440.5nm Peak**

|                         |                            |
|-------------------------|----------------------------|
| Model                   | Stern-Volmer (at 440.5 nm) |
| Equation                | $I_0/I = 1 \pm K_{sv} [Q]$ |
| $K_{sv}$                | $-0.00224 \pm 2.34541E-4$  |
| Residual Sum of Squares | 0.02452                    |
| Pearson's r             | 0.75888                    |
| R-Square (COD)          | 0.99442                    |
| Adj. R-Square           | 0.99349                    |

**T17: Calibration curves of H<sub>2</sub>O<sub>2</sub> sensors peak at 315nm and 440.5nm wavelengths.**

**a) At 315nm Peak**

| Model           | Asymptotic             |
|-----------------|------------------------|
| Equation        | $y = A - BC^x$         |
| A               | 185.96064 ± 43.05289   |
| B               | -3145.85261 ± 45.21972 |
| C               | 0.89318 ± 0.00407      |
| Reduced Chi-Sqr | 1469.89793             |
| R-Square (COD)  | 0.99882                |
| Adj. R-Square   | 0.99849                |

- **At 40°C**

| Model           | Asymptotic            |
|-----------------|-----------------------|
| Equation        | $y = A - BC^x$        |
| A               | 94.17931 ± 22.1738    |
| B               | -1134.2164 ± 20.32908 |
| C               | 0.91745 ± 0.00376     |
| Reduced Chi-Sqr | 163.63192             |
| R-Square (COD)  | 0.99887               |
| Adj. R-Square   | 0.99855               |

**b) At 440.5nm Peak**

| Model    | Asymptotic            |
|----------|-----------------------|
| Equation | $y = A - BC^x$        |
| A        | -218.38365 ± 360.5794 |

|                 |                         |
|-----------------|-------------------------|
| B               | -4188.00826 ± 327.34836 |
| C               | 0.94507 ± 0.00863       |
| Reduced Chi-Sqr | 9490.90283              |
| R-Square (COD)  | 0.99355                 |
| Adj. R-Square   | 0.9917                  |

- At 40°C

|                 |                        |
|-----------------|------------------------|
| Model           | Asymptotic             |
| Equation        | $y = A - BC^x$         |
| A               | -52.73118 ± 64.28093   |
| B               | -1695.08405 ± 59.06837 |
| C               | 0.95089 ± 0.00321      |
| Reduced Chi-Sqr | 195.30985              |
| R-Square (COD)  | 0.99909                |
| Adj. R-Square   | 0.99883                |

**T18: Stern-Volmer plots of H<sub>2</sub>O<sub>2</sub> sensors peak at 315nm and 440.5nm wavelengths.**

- a) At 315nm Peak

|                         |                          |
|-------------------------|--------------------------|
| Model                   | Stern-Volmer (at 315 nm) |
| Equation                | $I_0/I = 1 + K_{sv} [Q]$ |
| $K_{sv}$                | 0.27089 ± 0.01654        |
| Residual Sum of Squares | 5.50411                  |
| Pearson's r             | 0.99303                  |
| R-Square (COD)          | 0.97732                  |
| Adj. R-Square           | 0.9748                   |

- At 40°C

| Model                   | Stern-Volmer (at 315 nm)   |
|-------------------------|----------------------------|
| Equation                | $I_0/I = 1 \pm K_{sv} [Q]$ |
| $K_{sv}$                | $0.15939 \pm 0.00748$      |
| Residual Sum of Squares | 1.12542                    |
| Pearson's r             | 0.99185                    |
| R-Square (COD)          | 0.98936                    |
| Adj. R-Square           | 0.98818                    |

**b) At 440.5nm Peak**

| Model                   | Stern-Volmer (at 440.5 nm) |
|-------------------------|----------------------------|
| Equation                | $I_0/I = 1 \pm K_{sv} [Q]$ |
| $K_{sv}$                | $0.12064 \pm 0.00696$      |
| Residual Sum of Squares | 0.97306                    |
| Pearson's r             | 0.98876                    |
| R-Square (COD)          | 0.98642                    |
| Adj. R-Square           | 0.98491                    |

- At 40°C

| Model                   | Stern-Volmer (at 315 nm)   |
|-------------------------|----------------------------|
| Equation                | $I_0/I = 1 \pm K_{sv} [Q]$ |
| $K_{sv}$                | $0.09614 \pm 0.00486$      |
| Residual Sum of Squares | 0.47401                    |
| Pearson's r             | 0.9822                     |
| R-Square (COD)          | 0.9912                     |
| Adj. R-Square           | 0.99023                    |



T19: Langmuir binding constants of La QDs for F<sup>-</sup>, C<sub>2</sub>O<sub>4</sub><sup>2-</sup>, CO<sub>3</sub><sup>2-</sup>, HPO<sub>4</sub><sup>2-</sup>, Br<sup>-</sup>, BrO<sub>3</sub><sup>-</sup>, OH<sup>-</sup>, Cl<sup>-</sup> ions at the 315nm and 440.5nm wavelengths.

| Anions                                      | 1/I <sub>0</sub><br>(315nm<br>wavelength) | Slope<br>from<br>Langmuir<br>description<br>fitting<br>(315nm<br>wavelength) | Intercept                                                      | Binding<br>constant(B)<br>(315nm<br>wavelength) | 1/I <sub>0</sub><br>(440.5nm<br>wavelength) | Slope<br>from<br>Langmuir<br>description<br>fitting<br>(440.5nm<br>wavelength) | Intercept                                                      | Binding<br>constant(B)<br>(440.5nm<br>wavelength) |
|---------------------------------------------|-------------------------------------------|------------------------------------------------------------------------------|----------------------------------------------------------------|-------------------------------------------------|---------------------------------------------|--------------------------------------------------------------------------------|----------------------------------------------------------------|---------------------------------------------------|
| F <sup>-</sup>                              | 3.4595<br>6×10 <sup>-4</sup>              | 2.90815×<br>10 <sup>-4</sup> ±<br>7.01925×<br>10 <sup>-6</sup>               | 0.00143<br>±<br>7.23057<br>×10 <sup>-4</sup>                   | 0.20337<br>(± 0.97 ×<br>10 <sup>-2</sup> )      | 3.40842×<br>10 <sup>-4</sup>                | 2.03226×<br>10 <sup>-4</sup> ±<br>1.096×10 <sup>-5</sup>                       | 0.0024<br>±<br>0.00113                                         | 0.08468<br>(± 0.96 ×<br>10 <sup>-2</sup> )        |
| C <sub>2</sub> O <sub>4</sub> <sup>2-</sup> | 3.4595<br>6×10 <sup>-4</sup>              | 2.7806×1<br>0 <sup>-4</sup> ±<br>3.37839×<br>10 <sup>-6</sup>                | 3.84804<br>×10 <sup>-4</sup> ±<br>2.92231<br>×10 <sup>-4</sup> | 0.7226 (±<br>1.15 × 10 <sup>-2</sup> )          | 3.40842×<br>10 <sup>-4</sup>                | 2.16028×<br>10 <sup>-4</sup> ±<br>4.54463×<br>10 <sup>-6</sup>                 | 6.08957<br>×10 <sup>-4</sup> ±<br>3.9311<br>×10 <sup>-4</sup>  | 0.35475<br>(± 1.15 ×<br>10 <sup>-2</sup> )        |
| CO <sub>3</sub> <sup>2-</sup>               | 3.4595<br>6×10 <sup>-4</sup>              | 2.52658×<br>10 <sup>-4</sup> ±<br>5.43355×<br>10 <sup>-6</sup>               | 0.00148<br>±<br>7.39093<br>×10 <sup>-4</sup>                   | 0.17071<br>(± 0.73 ×<br>10 <sup>-2</sup> )      | 3.40842×<br>10 <sup>-4</sup>                | 1.71523×<br>10 <sup>-4</sup> ±<br>5.2722×1<br>0 <sup>-6</sup>                  | 0.00173<br>±<br>7.17146<br>×10 <sup>-4</sup>                   | 0.09915<br>(± 0.73 ×<br>10 <sup>-2</sup> )        |
| HPO <sub>4</sub> <sup>2-</sup>              | 3.4595<br>6×10 <sup>-4</sup>              | 2.90869×<br>10 <sup>-4</sup> ±<br>7.99597×<br>10 <sup>-7</sup>               | 2.94383<br>×10 <sup>-5</sup> ±<br>3.65687<br>×10 <sup>-5</sup> | 9.88063<br>(± 2.18 ×<br>10 <sup>-2</sup> )      | 3.40842×<br>10 <sup>-4</sup>                | 2.09423×<br>10 <sup>-4</sup> ±<br>7.6377×1<br>0 <sup>-6</sup>                  | 4.29545<br>×10 <sup>-4</sup> ±<br>3.49302<br>×10 <sup>-4</sup> | 0.48755<br>(± 2.18 ×<br>10 <sup>-2</sup> )        |
| Br <sup>-</sup>                             | 3.4595<br>6×10 <sup>-4</sup>              | 2.8243×1<br>0 <sup>-4</sup> ±<br>2.58782×<br>10 <sup>-6</sup>                | 3.66365<br>×10 <sup>-4</sup> ±<br>2.66573<br>×10 <sup>-4</sup> | 0.7709 (±<br>0.97 × 10 <sup>-2</sup> )          | 3.40842×<br>10 <sup>-4</sup>                | 2.01963×<br>10 <sup>-4</sup> ±<br>3.67487×<br>10 <sup>-6</sup>                 | 8.42041<br>×10 <sup>-4</sup> ±<br>3.78551<br>×10 <sup>-4</sup> | 0.23985<br>(± 0.97 ×<br>10 <sup>-2</sup> )        |
| BrO <sub>3</sub> <sup>-</sup>               | 3.4595<br>6×10 <sup>-4</sup>              | 2.95989×<br>10 <sup>-4</sup> ±<br>1.91713×<br>10 <sup>-6</sup>               | 4.33998<br>×10 <sup>-4</sup> ±<br>2.29134<br>×10 <sup>-4</sup> | 0.68201<br>(± 0.83 ×<br>10 <sup>-2</sup> )      | 3.40842×<br>10 <sup>-4</sup>                | 2.10252×<br>10 <sup>-4</sup> ±<br>3.48048×<br>10 <sup>-6</sup>                 | 0.00105<br>±<br>4.15984<br>×10 <sup>-4</sup>                   | 0.20024<br>(± 0.83 ×<br>10 <sup>-2</sup> )        |
| OH <sup>-</sup>                             | 3.4595<br>6×10 <sup>-4</sup>              | 3.09443×<br>10 <sup>-4</sup> ±<br>1.74903×<br>10 <sup>-6</sup>               | 4.48558<br>×10 <sup>-4</sup> ±<br>2.09043<br>×10 <sup>-4</sup> | 0.68986<br>(± 0.83 ×<br>10 <sup>-2</sup> )      | 3.40842×<br>10 <sup>-4</sup>                | 2.26718×<br>10 <sup>-4</sup> ±<br>3.55396×<br>10 <sup>-6</sup>                 | 0.0012<br>±<br>4.24766<br>×10 <sup>-4</sup>                    | 0.18893<br>(± 0.83 ×<br>10 <sup>-2</sup> )        |
| Cl <sup>-</sup>                             | 3.7900<br>3×10 <sup>-4</sup>              | 3.43745×<br>10 <sup>-4</sup> ±<br>2.93487×<br>10 <sup>-6</sup>               | 3.04169<br>×10 <sup>-4</sup> ±<br>3.02323<br>×10 <sup>-4</sup> | 0.20337<br>(± 0.97 ×<br>10 <sup>-2</sup> )      | 3.52149×<br>10 <sup>-4</sup>                | 2.39308×<br>10 <sup>-4</sup> ±<br>5.9718×1<br>0 <sup>-6</sup>                  | 0.00131<br>±<br>6.15159<br>×10 <sup>-4</sup>                   | 0.08468<br>(± 0.97 ×<br>10 <sup>-2</sup> )        |
